# Supplementary material for: Environmental Concentrations of Sulfonamides Can Alter Bacterial Structure and Induce Diatom Deformities in Freshwater Biofilm Communities
Source: PubMed Central journal article supplement (PMC8137839; doi:10.3389/fmicb.2021.643719), 2021-05-07
Supplement: Presentation_1.pdf [file Presentation_1.pdf]

**Environmental concentrations of sulfonamides can alter bacterial structure and induce diatom deformities in freshwater biofilm communities**

Laura Kergoat, Pascale Besse-Hoggan, Martin Lereboure, Jérémie Beguet, Marion Devers, Fabrice Martin-Laurent, Matthieu Masson, Soizic Morin, Amélie Roinat, Stéphane Pesce, Chloé Bonnineau

**SUPPLEMENTARY MATERIAL**

**Table S1.** Effective quantum yield in microbial communities non-exposed (control) and exposed to 500 or 5000 ng L<sup>-1</sup> of sulfamethoxazole (SMX) or sulfamethazine (SMZ) over time. Mean  $\pm$  standard deviation of effective quantum yield (r.u.) are indicated ( $n = 3$  per treatment).

|         | Days | Effective quantum yield |
|---------|------|-------------------------|
| Control | 7    | 0.17 $\pm$ 0.04         |
|         | 28   | 0.32 $\pm$ 0.07         |
| SMX     | 7    | 0.23 $\pm$ 0.04         |
|         | 28   | 0.29 $\pm$ 0.06         |
| SMX+    | 7    | 0.23 $\pm$ 0.06         |
|         | 28   | 0.26 $\pm$ 0.02         |
| SMZ     | 7    | 0.24 $\pm$ 0.06         |
|         | 28   | 0.25 $\pm$ 0.03         |
| SMZ+    | 7    | 0.21 $\pm$ 0.03         |
|         | 28   | 0.26 $\pm$ 0.03         |

**Table S2.** Microbial respiration (nmol CO<sub>2</sub> cm<sup>-2</sup> h<sup>-1</sup>) measured after 4h of incubation in microbial communities non-exposed (control) and exposed to 500 or 5000 ng L<sup>-1</sup> of sulfamethoxazole (SMX, SMX+) or sulfamethazine (SMZ, SMZ+) over time. NA: initial microbial communities sampled before contamination.

| Sampling day | Treatment | Microbial respiration<br>(nmol CO <sub>2</sub> cm <sup>-2</sup> h <sup>-1</sup> ) |
|--------------|-----------|-----------------------------------------------------------------------------------|
| 0            | NA        | 0.33                                                                              |
| 0            | NA        | 0.36                                                                              |
| 0            | NA        | 0.18                                                                              |
| 14           | Control   | 14.74                                                                             |
| 14           | Control   | 16.03                                                                             |
| 14           | Control   | 14.35                                                                             |
| 14           | SMX       | 16.97                                                                             |
| 14           | SMX       | 15.19                                                                             |
| 14           | SMX       | 16.06                                                                             |
| 14           | SMX+      | 17.51                                                                             |
| 14           | SMX+      | 16.92                                                                             |
| 14           | SMX+      | 12.08                                                                             |
| 14           | SMZ       | 12.28                                                                             |
| 14           | SMZ       | 15.45                                                                             |
| 14           | SMZ       | 14.71                                                                             |
| 14           | SMZ+      | 11.63                                                                             |
| 14           | SMZ+      | 16.60                                                                             |
| 14           | SMZ+      | 12.77                                                                             |
| 28           | Control   | 47.82                                                                             |
| 28           | Control   | 62.73                                                                             |
| 28           | Control   | 57.28                                                                             |
| 28           | SMX       | 53.81                                                                             |
| 28           | SMX       | 61.41                                                                             |
| 28           | SMX       | 79.09                                                                             |
| 28           | SMX+      | 63.50                                                                             |
| 28           | SMX+      | 78.81                                                                             |
| 28           | SMX+      | 60.94                                                                             |
| 28           | SMZ       | 43.27                                                                             |
| 28           | SMZ       | 52.04                                                                             |
| 28           | SMZ       | 60.95                                                                             |
| 28           | SMZ+      | 47.35                                                                             |
| 28           | SMZ+      | 54.39                                                                             |
| 28           | SMZ+      | 41.77                                                                             |

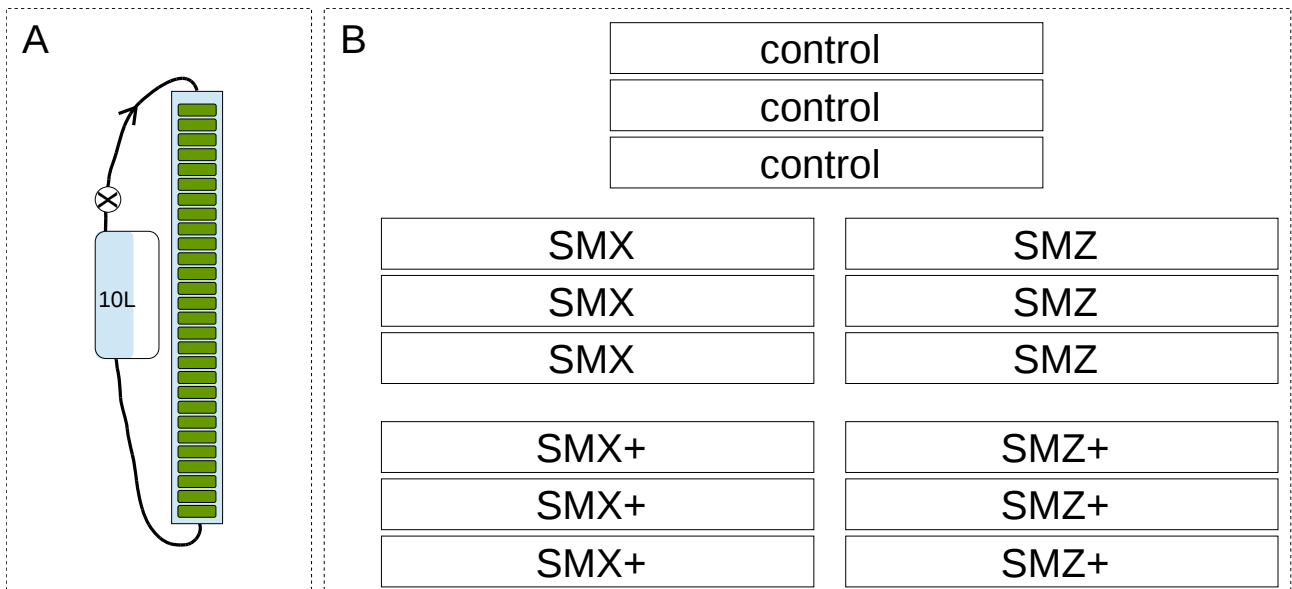

**Figure S1.** A: schematic drawing of an experimental channel. B: experimental design, SMX: channels exposed to 500 ng L<sup>-1</sup> of SMX, SMX+: channels exposed to 5000 ng L<sup>-1</sup> of SMX, SMZ: channels exposed to 500 ng L<sup>-1</sup> of SMZ, SMZ+: channels exposed to 5000 ng L<sup>-1</sup> of SMZ.

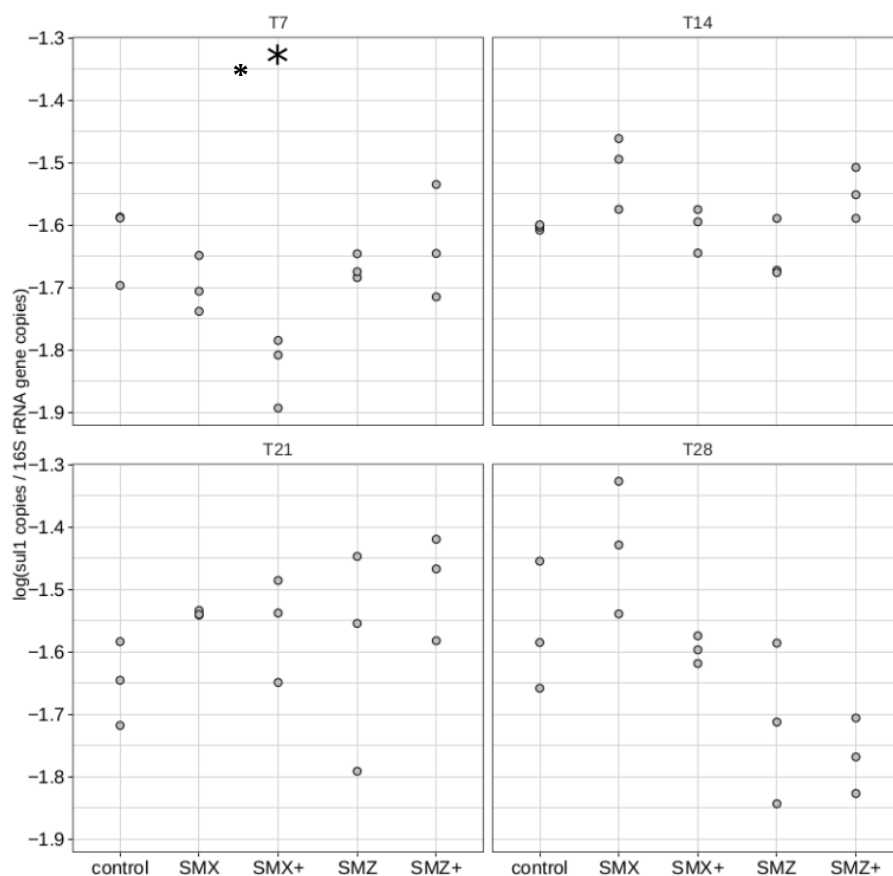

**Figure S2.** Relative concentration of *sul1* in control biofilms and in biofilms exposed to sulfamethoxazole (500 ng L<sup>-1</sup>: SMX; 5000 ng L<sup>-1</sup>: SMX+) or sulfamethazine (500 ng L<sup>-1</sup>: SMZ; 5000 ng L<sup>-1</sup>: SMZ+) over time. Each point corresponds to one of three different biological replicates. Exposure time is indicated above each graph: 7, 14, 21 or 28 days. Stars indicate significant differences ( $p < 0.05$ , Dunnett test) from controls of biofilms exposed to sulfonamides.

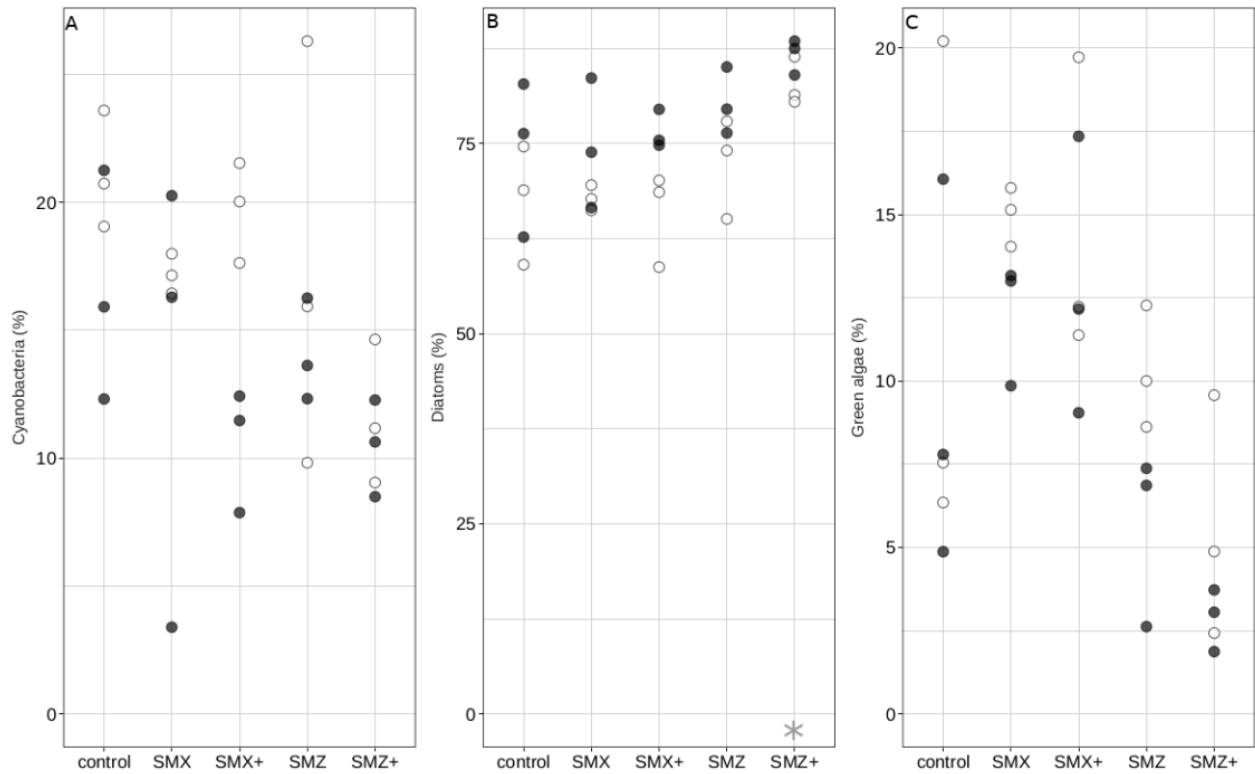

**Figure S3.** Composition of the autotrophic community: percentage of cyanobacteria (A), diatoms (B), green algae (C) in control biofilms and biofilms exposed to sulfonamides (500 ng/L: SMX, 5000 ng/L: SMX+; 500 ng/L: SMZ, 5000 ng/L: SMZ+). White circles correspond to biofilms exposed for 14 days while black circles correspond to biofilms exposed for 28 days. Stars indicate significant differences ( $p < 0.05$ ) from controls of biofilms exposed to antibiotics after 14 days of exposure.

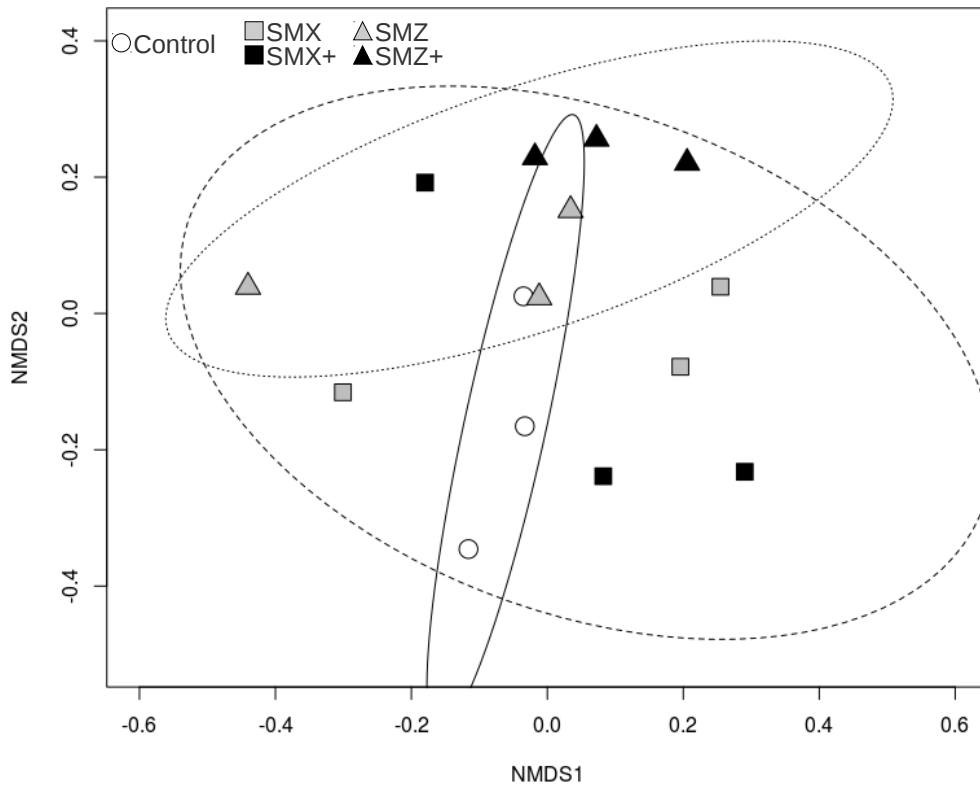

**Figure S4.** nMDS representation of Bray-Curtis distance similarities between diatom communities after 28 days of exposure to sulfonamides (sulfamethoxazole, SMX; sulfamethazine, SMZ). The stress value is 0.192. Controls are represented by white circles, communities exposed to SMX by squares and to SMZ by triangles. The level of exposure to sulfonamides is color-coded as follows: grey for exposure to 500 ng L<sup>-1</sup> and black for exposure to 5000 ng L<sup>-1</sup>. Ellipses correspond to the 95% confidence interval around the centroid of the following groups: control, exposed to SMX (including SMX and SMX+), exposed to SMZ (including SMZ and SMZ+).
